# Supplementary material
Source: publisher figshare collection journal article supplement (https://acs.figshare.com/ndownloader/files/13778189)
Supplement: Supplementary file 1 [file 13778189]

# Crystal growth from aqueous solution in the presence of structured impurities

Juan I. Lopez Ortiz,<sup>†</sup> Evelina Quiroga,<sup>‡</sup> Claudio F. Narambuena,<sup>¶</sup> and Antonio J. Ramirez-Pastor<sup>\*,†</sup>

<sup>†</sup>*Instituto de Física Aplicada, Universidad Nacional de San Luis-CONICET, 5700 San Luis, Argentina*

<sup>‡</sup>*Laboratorio de Membranas y Biomateriales, Instituto de Física Aplicada, Universidad Nacional de San Luis-CONICET, 5700 San Luis, Argentina*

<sup>¶</sup>*Facultad Regional San Rafael, Universidad Tecnológica Nacional-CONICET, 5600 San Rafael, Argentina*

E-mail: antorami@unsl.edu.ar

## Appendix A: Adsorbed and solution phase equilibrium

At equilibrium, the chemical potential of the adsorbed and solution phase are equal. Then

$$\mu_{ads} = \mu_{sol}, \quad (1)$$

where  $\mu_{sol}$  corresponds to the chemical potential of an ideal solution at concentration  $\rho_I$  and temperature  $T$ . Hence,

$$\beta\mu_{sol} = \beta\mu_0 + \ln \rho_I, \quad (2)$$

where  $\mu_0$  is the standard chemical potential and  $\beta = 1/k_B T$ .

The chemical potential is defined as

$$\mu_0 = -k_B T \ln \left\{ \left( \frac{2\pi m k_B T}{h^2} \right)^{3/2} k_B T \right\}, \quad (3)$$

where  $h$  is the Planck constant ( $h = 6.6260 \times 10^{-34} J.s$ ) and  $m$  is the mass of the  $k$ -mer. Taking into account that the mass of a  $k$ -mer is directly proportional to the mass of the monomer unit:  $m = km_0$  with  $m_0$  the mass of the monomer unit. Then, Eq. 2 can be rewritten as:

$$\beta\mu_{sol} = -\frac{3}{2} \ln k - \ln \left\{ \left( \frac{2\pi m_0 k_B T}{h^2} \right)^{3/2} k_B T \right\} + \ln \rho_I, \quad (4)$$

and

$$\beta\mu_{sol} = -\frac{3}{2} \ln k + \ln C_I, \quad (5)$$

where  $C_I = \rho_I/\rho_I^*$  and  $\rho_I^* = \left\{ \left( \frac{2\pi m_0 k_B T}{h^2} \right)^{3/2} k_B T \right\}$ . This expression relates the chemical potential in solution with the impurity sizes and the concentration in the bulk.

## Appendix B: Monte Carlo simulation details

MC simulations were used in order to test the applicability of the new theoretical proposition. The calculations were performed by using  $L$ -one-dimensional lattices ( $M = L$  sites) and  $L \times L$ -square lattices ( $M = L^2$  sites) with periodic boundary conditions. A linear  $k$ -mer is modeled as a group of collinear identical units, each one occupying a single site on the lattice (see Fig. 1).  $\varepsilon_0$  is the adsorption energy of a  $k$ -mer unit. Then, the corresponding adsorption energies are  $\varepsilon_1 = \varepsilon_0$ ,  $\varepsilon_2 = 2\varepsilon_0$ ,  $\varepsilon_3 = 3\varepsilon_0$  and  $\varepsilon_4 = 4\varepsilon_0$  for monomers, dimers, trimers and tetramers, respectively.

The crystal surface is in contact with an impurity solution of  $k$ -mers with concentration  $C_I$  at temperature  $T$ . Then, the adsorption process is simulated through a grand canonical ensemble Monte Carlo method. The procedure is as follows. For a given value of the temperature  $T$  and concentration  $C_I$ , an initial configuration with  $N_k$  dimers adsorbed at random positions (on  $kN_k$  sites) is generated. Then, an adsorption/desorption process is started, where a linear  $k$ -uple of nearest-neighbor sites is randomly chosen, and a random number  $\xi \in [0, 1]$  is generated:

- 1) if the selected entity is a  $k$ -uple of empty sites then adsorb a molecule if  $\xi \leq W_{ads}$ ;
- 2) if the selected entity is a  $k$ -uple of sites occupied by atoms belonging to the same molecule then desorb the molecule if  $\xi \leq W_{des}$ ;
- 3) otherwise, the attempt is rejected.

$W_{ads}$  and  $W_{des}$  are the transition probabilities given by the Metropolis rule:

$$W_{ads} = \min \left\{ 1, C_I \exp \left( -\frac{\Delta E}{k_B T} \right) \right\}, \quad (6)$$

and

$$W_{des} = \min \left\{ 1, \frac{1}{C_I} \exp \left( -\frac{\Delta E}{k_B T} \right) \right\}, \quad (7)$$

where  $\Delta E$  is the difference between final-state energy and initial-state energy.  $\Delta E = k\varepsilon_0$  in Eq. 6, and  $\Delta E = -k\varepsilon_0$  in Eq. 7.

A Monte Carlo Step (MCS) is achieved when  $M$   $k$ -uples have been tested to change its occupancy state. In our MC simulations, the equilibrium state can be well reproduced after discarding the first  $10^6$  MCS. Then, averages are taken over  $10^6$  MCS successive configurations.

The adsorption isotherm (surface coverage as a function of the concentration) is obtained as:

$$\theta_k(C_I) = \frac{k\langle N_k \rangle}{M}, \quad (8)$$

where the brackets mean the time average over the MC simulation runs.
